# Supplementary material for: Fluorinated Cell-Penetrating Peptide for Co-Delivering siHIF-1α and Sorafenib to Enhance In Vitro Anti-Tumor Efficacy
Source: MDPI journal article supplement (doi:10.3390/pharmaceutics15122789), 2023-12-16
Supplement: s1 [file s1]

# Supporting Information for

## Fluorinated peptide for co-delivering siHIF-1 $\alpha$ and sorafenib to enhance in vitro anti-tumor efficacy

*Yu Wan\*, Yuhan Yang, Qiuyue Lai, Wangxia Wang, Mingyu Wu, Shun Feng*

Sichuan Engineering Research Center for Biomimetic Synthesis of Natural Drugs, School of Life Science and Engineering, Southwest Jiaotong University, Chengdu 610031, China.

## Supplementary Figures

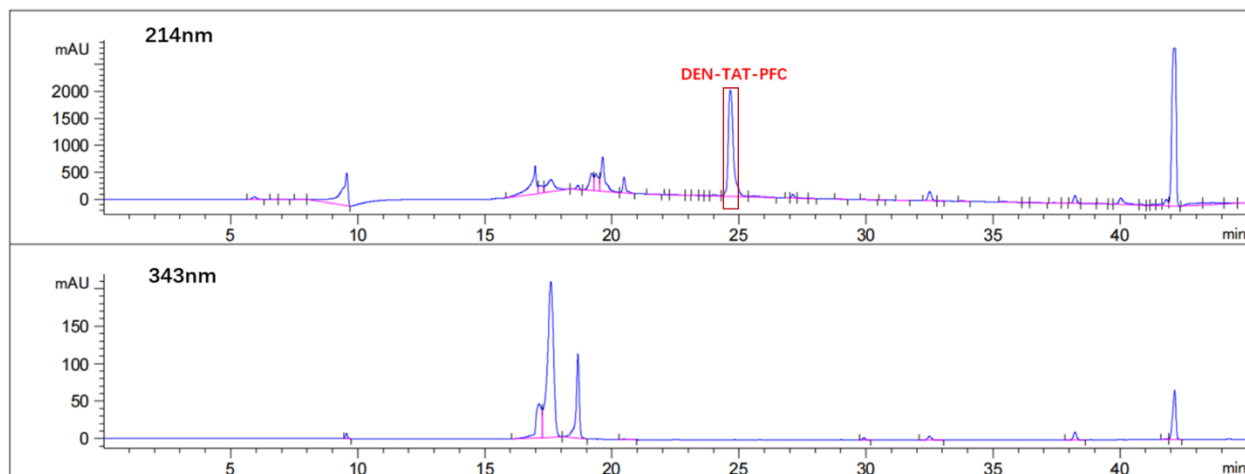

**Figure S1.** The preparative HPLC chromatogram of its purification. The red circle labeled peak was collected as the product of DEN-TAT-PFC. The peptides DEN-TAT, DEN-TAT-PFC, and PFC were detected at 214 nm and the byproduct pyridine-2-thione was detected at 343 nm.

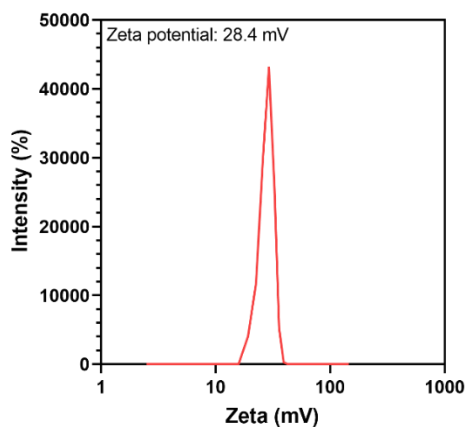

**Figure S2.** Zeta potential of DEN-TAT-PFC/SF/siHIF-1 $\alpha$ .

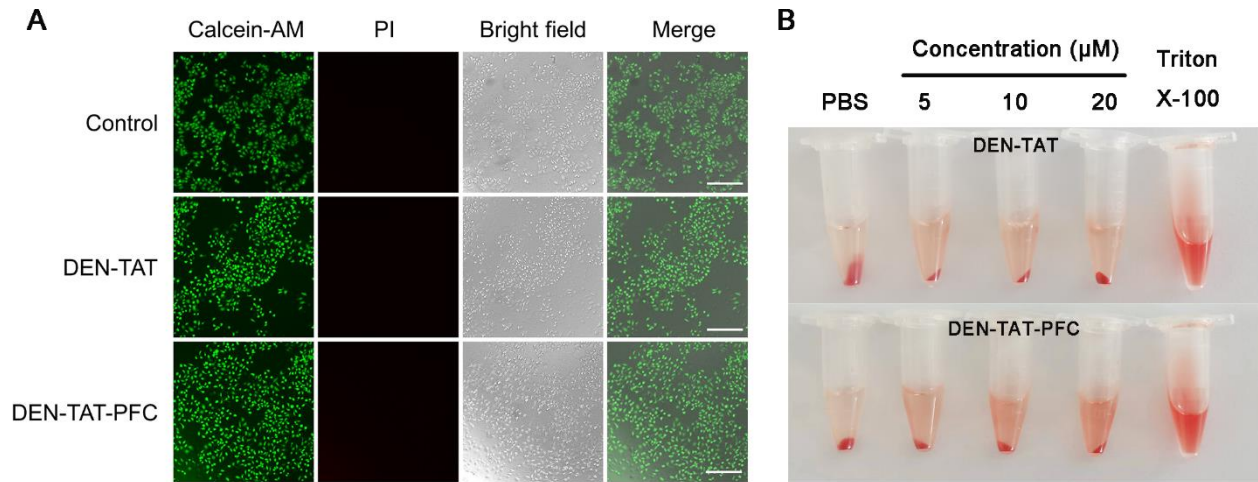

**Figure S3.** (A) Live dead staining of HepG2 cells treated with DEN-TAT and DEN-TAT-PFC at concentrations of  $8.75 \mu\text{M}$ . Scale bar:  $100 \mu\text{m}$ . (B) Images after centrifugation of peptides incubated with 2% blood cell solution at different concentrations.

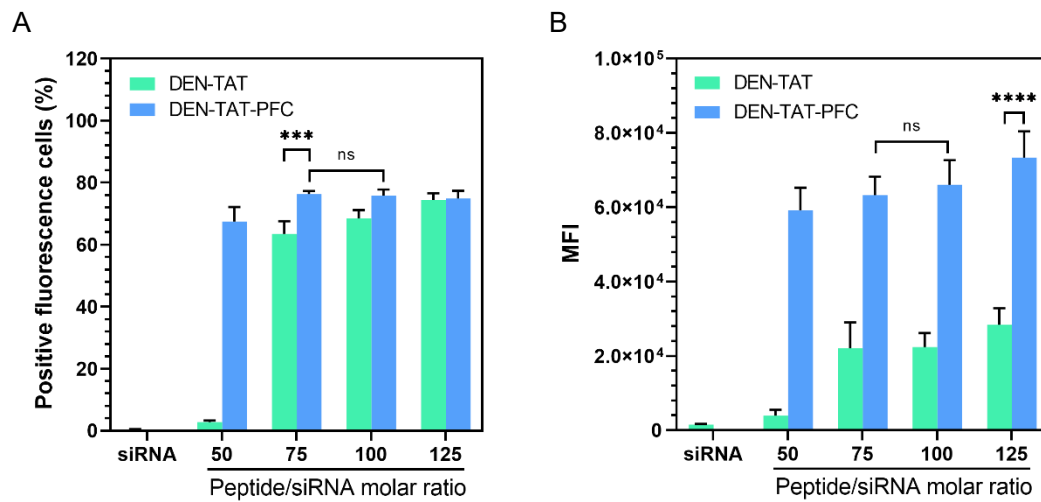

**Figure S4.** (A) The percentage of cells containing Cy5 labeled siRNA and (B) mean fluorescence intensity (MFI) of 4T1 cells after incubation with DEN-TAT/siRNA and DEN-TAT-PFC/siRNA complexes at different molar ratios (50, 75, 100 and 125), quantified by flow cytometry.

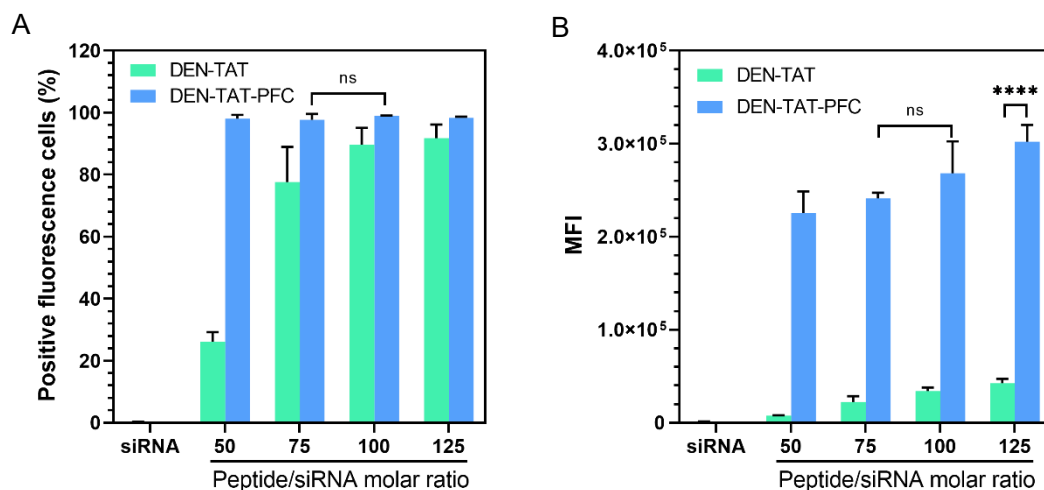

**Figure S5.** (A) The percentage of cells containing Cy5 labeled siRNA and (B) mean fluorescence intensity (MFI) of B16 cells after incubation with DEN-TAT/siRNA and DEN-TAT-PFC/siRNA complexes at different molar ratios (50, 75, 100 and 125), quantified by flow cytometry.

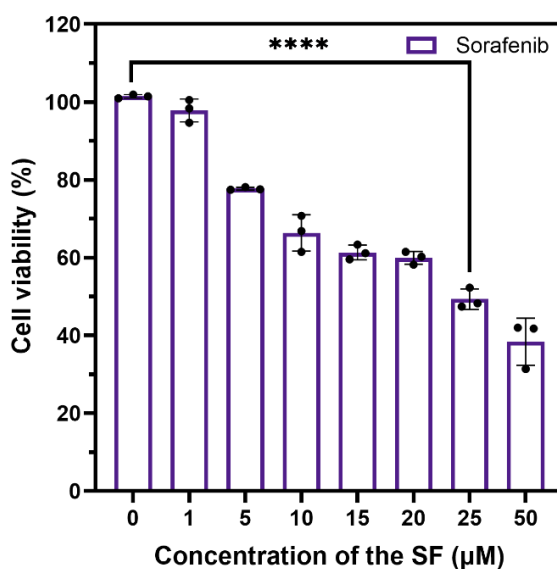

**Figure S6.** The cell viability of HepG2 cells treated with different concentration of sorafenib (1~50 μM).

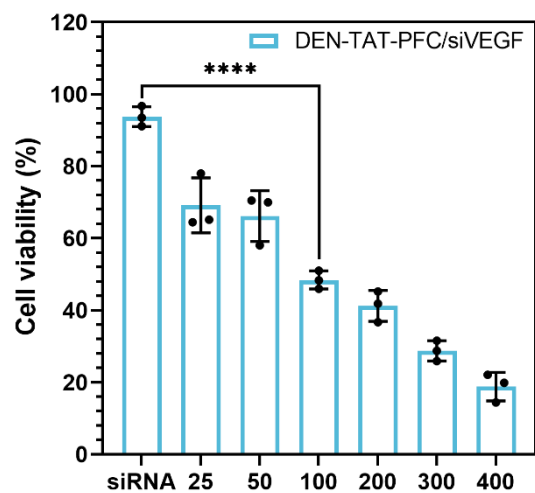

**Figure S7.** The cell viability of HepG2 cells treated with DEN-TAT-PFC/siVEGF formed at molar ratio 100 and different siRNA concentrations.

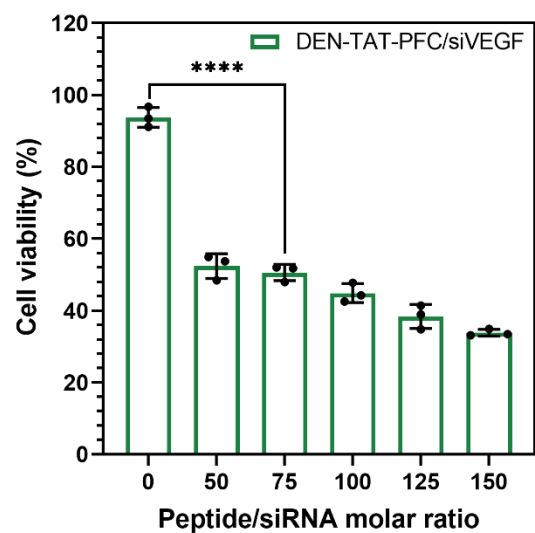

**Figure S8.** The cell viability of HepG2 cells treated with DEN-TAT-PFC/siVEGF formed with 200 nM siVEGF at different molar ratios.

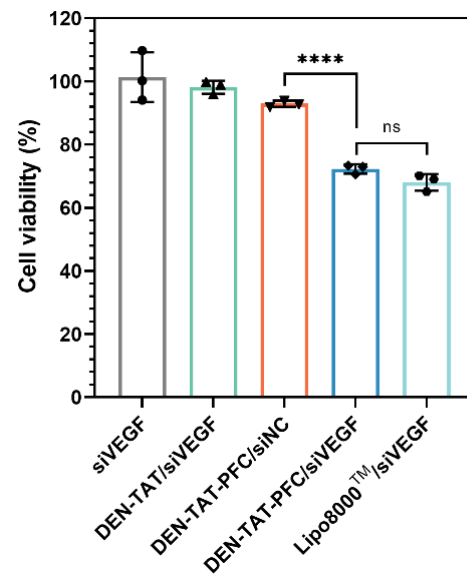

**Figure S9.** The effects of different formulations on the viability of HepG2 cells.

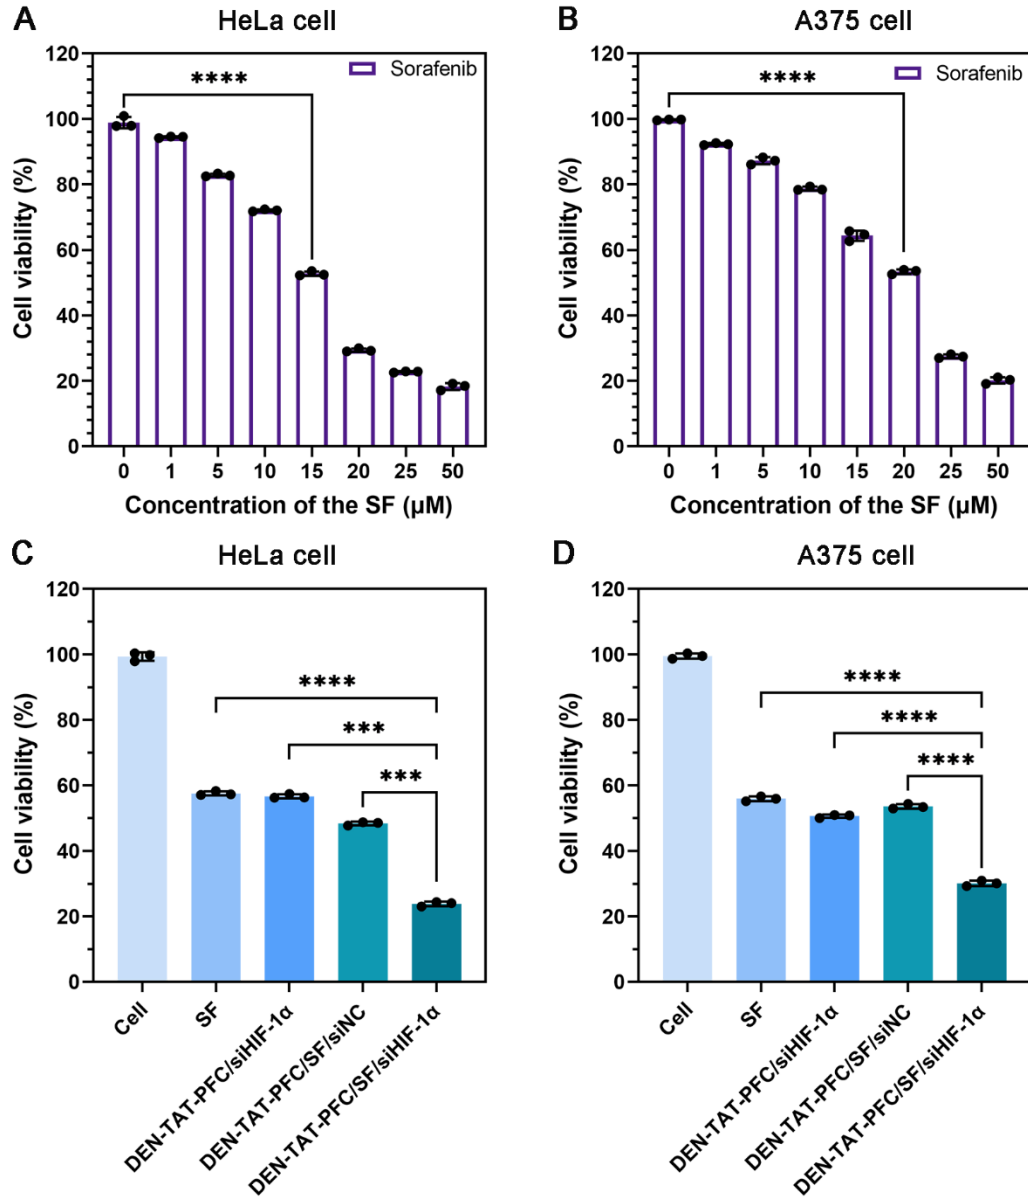

**Figure S10.** The cell viability of HeLa (A) and A375 cells (B) treated with different concentration of sorafenib (1~50  $\mu$ M). The effects of different formulations on the viabilities of HeLa cells (C) and A375 cells (D) within 48 h. 15  $\mu$ M sorafenib was used in HeLa cells, and 20  $\mu$ M sorafenib was used in A375 cells. The data are expressed as mean  $\pm$  SD (n = 3). \*\*\*p < 0.001, \*\*\*\*p < 0.0001.

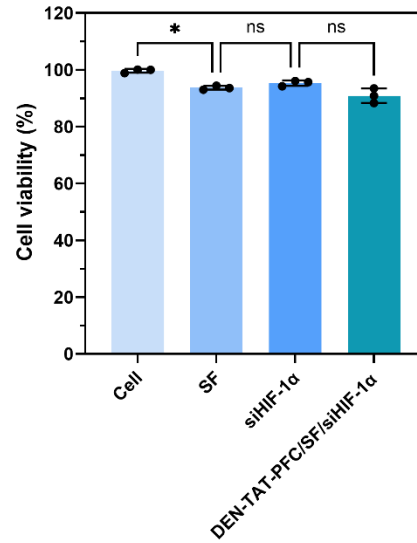

**Figure S11.** The cell viability of LO2 cells treated with SF, siHIF-1 $\alpha$  and DEN-TAT-PFC/SF/siHIF-1 $\alpha$ . The data are expressed as mean  $\pm$  SD (n = 3). ns represents no significant difference, \*p < 0.05.

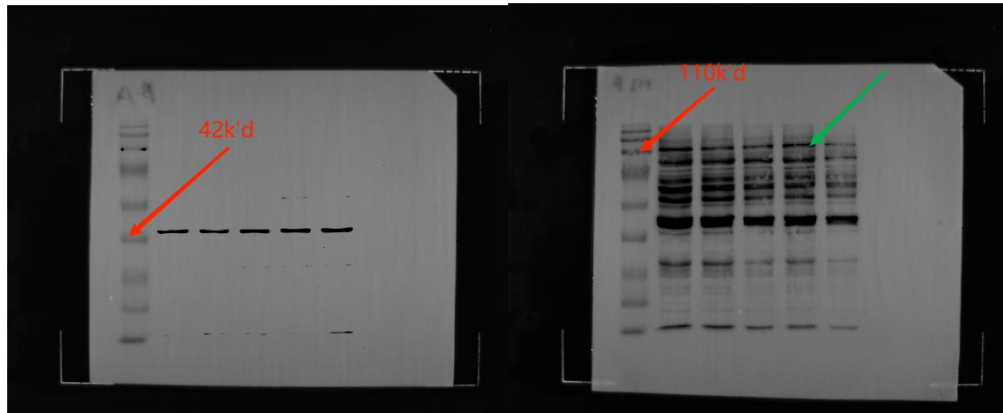

**Figure S12.** The raw data for Figure 6B (Western blot assay results for HIF-1 $\alpha$ ) in form of the uncropped blots and with molecular weight markers.



## Supplementary Tables

**Table S1. Mobile phase gradient elution program**

| Time (min) | Flow Rate (mL/min) | Water + 0.1% TFA (%) | Acetonitrile + 0.1% TFA (%) |
|------------|--------------------|----------------------|-----------------------------|
| 0          | 2.0                | 100.0                | 0.0                         |
| 5          | 2.0                | 90.0                 | 10.0                        |
| 30         | 2.0                | 20.0                 | 80.0                        |
| 35         | 2.0                | 0.0                  | 100.0                       |
| 42         | 2.0                | 0.0                  | 100.0                       |
| 45         | 2.0                | 100.0                | 0.0                         |

**Table S2. Specific primer sequences used in Quantitative Real-time PCR**

| Gene           | Forward primer                             | Reverse primer                                |
|----------------|--------------------------------------------|-----------------------------------------------|
| VEGF           | 5'- AGG AGG GCA GAA TCA TCA<br>CG -3'      | 5'- GAT CCG CAT AAT CTG CAT<br>GGT -3'        |
| HIF-1 $\alpha$ | 5'- TCA CCA CAG GAC AGT ACA<br>GGA TGC -3' | 5'- CCA GCA AAG TTA AAG CAT<br>CAG GTT CC -3' |
| GAPDH          | 5'- CCA AGG TCA ACC ATG ACA<br>AC -3'      | 5'- TCC ACA GTC TTC TGA GTG<br>GC -3'         |
| $\beta$ -actin | 5'- GTG GGG CGC CCC AGG CAC<br>CAG GGC -3' | 5'- CTC CTT AAT GTC ACG CAC<br>GAT TTC -3'    |
